# Supplementary material for: Has Section 404 of the Sarbanes–Oxley Act Discouraged Corporate Investment? New Evidence from a Natural Experiment
Source: Atypon-hosted journal article supplement (doi:10.1287/mnsc.2018.3090), 2019-04-19
Supplement: mnsc.2018.3090.sm1.pdf [file mnsc.2018.3090.sm1.pdf]

**Online Appendix to Has Section 404 of the Sarbanes-Oxley Act Discouraged  
Corporate Investment? New Evidence from a Natural Experiment**

**Ana Albuquerque**

Questrom School of Business  
Boston University  
Católica-Lisbon  
Business & Economics  
albuquea@bu.edu

**Julie Lei Zhu**

Fanhai International School of Finance  
Fudan University  
juliezhuqian@gmail.com

**March 2018**

This appendix includes an additional table not reported in the paper.

- Tests of whether Delta and Vega, as proxies for managerial incentives to engage in risky investments, changed post SOX404 and univariate comparison with the Cohen et al 's sample: Online Appendix Table 1.

**Online Appendix Table 1: Tests of Whether Delta and Vega Changed post SOX404 and Univariate Comparison with Cohen et al 's Sample on CEO Compensation**

The following tables provide summary statistics on delta and vega with data available from Execucomp, using both our sample and Cohen et al. (2013)'s sample. Delta measures dollar change in wealth associated with a 1% change in the firm's stock price (in \$000s), while vega is the dollar change in wealth associated with a 0.01 change in the standard deviation of the firm's returns (in \$000s). T-tests calculate whether the mean values during the Post-SOX404 period (2004-2005) is equal to the mean value during the Pre-SOX404 period (2002-2003). Panel A and Panel B present the summary statistics for delta and vega, respectively.

Panel A: *t*-test for Delta

| Year                                      | <u>Our Sample</u> |                |     | <u>Cohen et al 's Sample</u> |                |        | <u>Mean difference</u> | <u>P-value</u> |
|-------------------------------------------|-------------------|----------------|-----|------------------------------|----------------|--------|------------------------|----------------|
|                                           | Mean              | STD            | Obs | Mean                         | STD            | Obs    |                        |                |
| 2002                                      | 31.14             | 78.56          | 330 | 202.15                       | 527.82         | 7,991  | -171.01                | 0.00           |
| 2003                                      | 65.46             | 151.35         | 432 | 248.20                       | 587.83         | 8,497  | -182.75                | 0.00           |
| 2004                                      | 67.41             | 157.00         | 455 | 259.59                       | 600.25         | 8,323  | -192.18                | 0.00           |
| 2005                                      | 70.57             | 163.40         | 444 | 267.51                       | 632.35         | 8,073  | -196.94                | 0.00           |
| Pre-SOX404 (2002-2003)                    | 50.59             | 126.22         | 762 | 225.88                       | 560.00         | 16,488 | -175.29                | 0.00           |
| Post-SOX404 (2004-2005)                   | 68.97             | 160.11         | 899 | 263.49                       | 616.26         | 16,396 | -194.52                | 0.00           |
| <i>t</i> -test: Post-SOX404–Pre-SOX404 =0 | 6.89              | <i>P</i> =0.07 |     | 32.38                        | <i>P</i> =0.00 |        | -25.49                 | <i>P</i> =0.00 |

Panel B: *t*-test for Vega

| Year                                      | <u>Our Sample</u> |                |     | <u>Cohen et al 's Sample</u> |                |        | <u>Mean difference</u> | <u>P-value</u> |
|-------------------------------------------|-------------------|----------------|-----|------------------------------|----------------|--------|------------------------|----------------|
|                                           | Mean              | STD            | Obs | Mean                         | STD            | Obs    |                        |                |
| 2002                                      | 6.73              | 8.61           | 344 | 65.73                        | 129.39         | 8,395  | -58.99                 | 0.00           |
| 2003                                      | 9.67              | 11.98          | 448 | 73.58                        | 138.20         | 8,843  | -63.91                 | 0.00           |
| 2004                                      | 9.78              | 13.09          | 475 | 71.53                        | 134.41         | 8,653  | -61.75                 | 0.00           |
| 2005                                      | 9.67              | 13.82          | 459 | 69.01                        | 133.20         | 8,370  | -59.34                 | 0.00           |
| Pre-SOX404 (2002-2003)                    | 8.39              | 10.74          | 792 | 69.76                        | 134.04         | 17,238 | -61.36                 | 0.00           |
| Post-SOX404 (2004-2005)                   | 9.73              | 13.45          | 934 | 70.29                        | 133.82         | 17,023 | -60.57                 | 0.00           |
| <i>t</i> -test: Post-SOX404–Pre-SOX404 =0 | 0.81              | <i>P</i> =0.04 |     | 2.57                         | <i>P</i> =0.01 |        | -1.76                  | <i>P</i> =0.14 |
